# Supplementary material for: Clinical Meaning of Stromal Tumor Infiltrating Lymphocytes (sTIL) in Early Luminal B Breast Cancer
Source: MDPI journal article supplement (doi:10.3390/cancers15102846), 2023-05-20
Supplement: s1 [file s1]

## **SUPPLEMENTARY MATERIALS**

### **SUPPLEMENTARY FIGURES**

**Figure S1.** Cohort diagram of the study.

**Figure S2.** Histogram of frequencies of sTIL score in luminal breast cancer.

### **SUPPLEMENTARY TABLES**

**Table S1.** Additional patient characteristics and sTIL distribution.

**Table S2.** Univariable logistic regression models for prediction of pCR after neoadjuvant chemotherapy in luminal breast cancer (N=187).

**Table S3.** Multivariable Cox regression models for RFI in luminal breast cancer,

**Table S4.** Multivariable Cox regression models for OS in luminal breast cancer.

**Table S5.** Multivariable Cox regression models for OS in luminal B breast cancer.

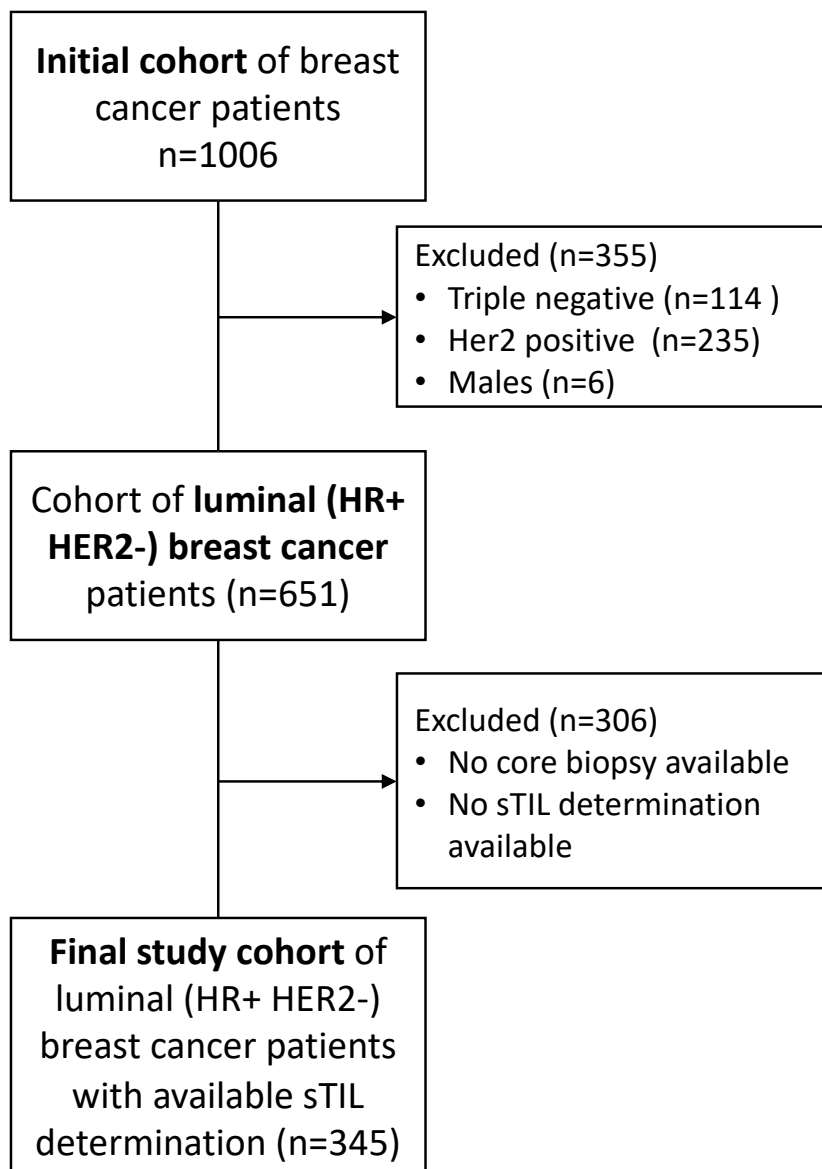

**Supplementary Figure S1.** Consort diagram of the study.

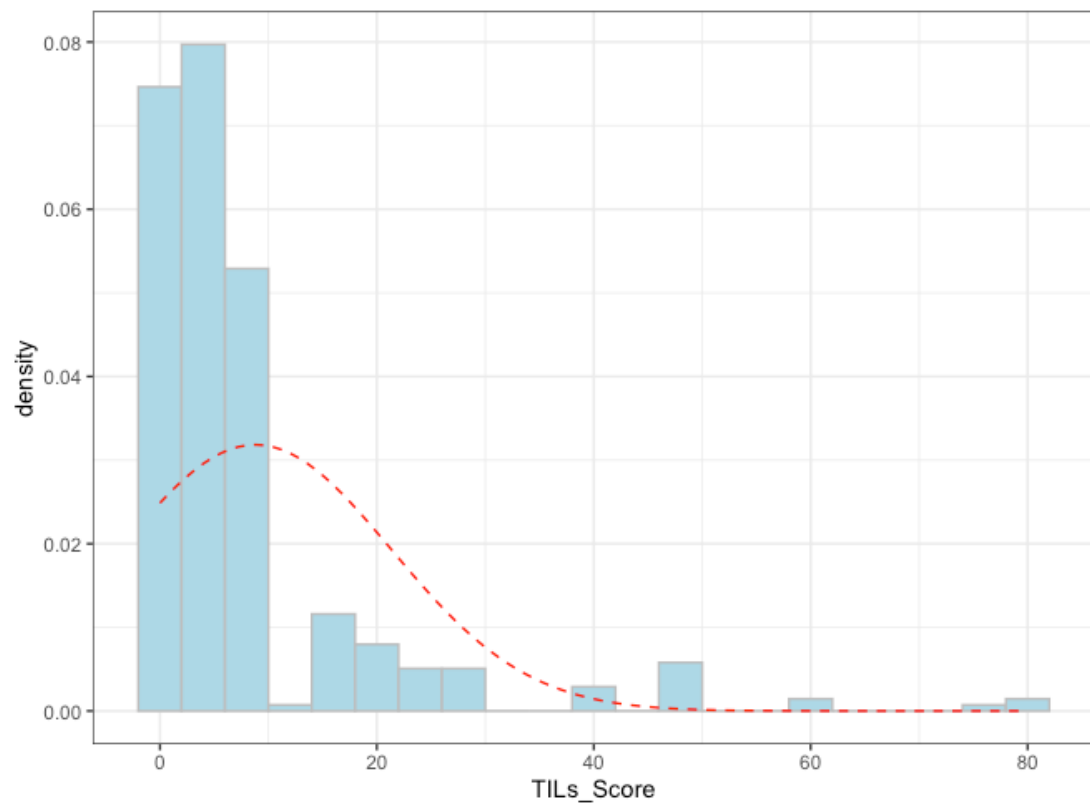

**Supplementary Figure S2.** Histogram of frequencies of sTIL score (percentage determined by standard methods [23, 24]) in luminal breast cancer. The red line represents the normal curve, reflecting a non-normal distribution.

**Supplementary Table S1.** Additional patient characteristics and sTIL distribution

| Characteristic   | Total       | sTIL            | P value* | sTIL=0%     | sTIL >0%    | P value* |
|------------------|-------------|-----------------|----------|-------------|-------------|----------|
|                  | N (%)       | Median (Q1, Q3) |          | N (%)       | N (%)       |          |
| <b>Total</b>     | 345 (100%)  | 5 (0, 10)       | --       | 100 (29.0%) | 245 (71.0%) | --       |
| <b>Detection</b> |             |                 | <0.001   |             |             | < 0.001  |
| Symptoms         | 298 (86.4%) | 5 (2.5, 10)     |          | 69 (69.0%)  | 229 (93.5%) |          |
| Screening        | 47 (13.6%)  | 0 (0, 5)        |          | 31 (31.0%)  | 16 (6.5%)   |          |
| <b>Ki67</b>      |             |                 |          |             |             | < 0.001  |
| <10%             | 57 (16.5%)  | 1 (0, 5)        | <0.001   | 28 (28.0%)  | 29 (11.8%)  |          |
| >=10%            | 288 (83.5%) | 5 (1, 10)       |          | 72 (72.0%)  | 216 (88.2%) |          |
| <b>LVI</b>       |             |                 | 0.880    |             |             | 0.997    |
| No               | 161 (68.2%) | 5 (0, 10)       |          | 58 (68.2%)  | 103 (68.2%) |          |
| Yes              | 75 (31.8%)  | 5 (0, 10)       |          | 27 (31.8%)  | 48 (31.8%)  |          |
| <b>pN/ypN</b>    |             |                 | 0.69     |             |             | < 0.001  |
| pN0              | 107 (31.1%) | 0 (0, 5)        |          | 56 (56.0%)  | 51 (20.9%)  |          |
| pN1              | 37 (10.8%)  | 0 (0, 10)       |          | 19 (19.0%)  | 18 (7.4%)   |          |
| pN2              | 13 (3.8%)   | 5 (0, 5)        |          | 6 (6.0%)    | 7 (2.9%)    |          |
| pN3              | 1 (0.3%)    | 0 (0, 0)        |          | 1 (1.0%)    | 0 (0.0%)    |          |
| ypN0             | 49 (14.2%)  | 10 (5, 25)      |          | 5 (5.0%)    | 44 (18.0%)  |          |
| ypN1             | 71 (20.6%)  | 10 (5, 10)      |          | 7 (7.0%)    | 64 (26.2%)  |          |
| ypN2             | 37 (10.8%)  | 5 (5, 10)       |          | 4 (4.0%)    | 33 (13.5%)  |          |
| ypN3             | 15 (4.4%)   | 5 (5, 10)       |          | 1 (1.0%)    | 14 (5.7%)   |          |
| ypNx             | 14 (4.1%)   | 10 (6.2, 19)    |          | 1 (1.0%)    | 13 (5.3%)   |          |
| <b>Setting</b>   |             |                 |          |             |             | < 0.001  |
| Neoadjuvant      | 187 (54.2%) | 10 (5, 15)      | <0.001   | 18 (18.0%)  | 169 (69.0%) |          |
| Adjuvant         | 158 (45.8%) | 0 (0, 5)        |          | 82 (82.0%)  | 76 (31.0%)  |          |

\*Differences assessed with the the Chi<sup>2</sup> test ; P values were adjusted for multiple comparisons (Benjamini-Hochberg method).

LVI: lympho-vascular invasion. pN/ypN: pathological N (node) stage.

**Supplementary Table S2.** Univariable logistic regression models for prediction of pCR after neoadjuvant chemotherapy in luminal breast cancer (N=187).

| Model                    | OR (95% CI)       | P-value* | AIC   | AUC ROC |
|--------------------------|-------------------|----------|-------|---------|
| Histology (lobular)      | 0.00 (--)         | 0.318    | 111.6 | 0.526   |
| Luminal B subtype        | 1.66 (0.30, 30.9) | 0.613    | 113.0 | 0.518   |
| PgR positive             | 0.29 (0.10, 1.01) | 0.103    | 109.3 | 0.597   |
| Ki67 (continuous)        | 1.06 (1.03, 1.09) | <0.001   | 87.5  | 0.822   |
| Grade 3                  | 4.77 (1.59, 17.6) | 0.021    | 105   | 0.682   |
| cT size (continuous, cm) | 0.99 (0.96, 1.01) | 0.567    | 111.9 | 0.513   |
| cN                       |                   | 0.613    | 113.6 | 0.582   |
| cN1                      | 0.43 (0.10, 1.74) |          |       |         |
| cN2-3                    | 0.61 (0.18, 2.18) |          |       |         |

\*P-values corrected for multiple comparisons (Benjamini-Hochberg method).

PgR: progesterone receptors. cT size: clinical tumor (cT) size (cm). cN: clinical nodal stage.

**Supplementary Table S3.** Multivariable Cox regression models for RFI in luminal breast cancer.

| Models                                                               | HR (95% CI)       | <i>p</i> -value | AIC   | C-index | LRT <i>p</i> -value                       |
|----------------------------------------------------------------------|-------------------|-----------------|-------|---------|-------------------------------------------|
| Model 1 = T size + N+ (nr) + PgR                                     |                   |                 |       |         |                                           |
| T size (cm)                                                          | 1.02 (1.00, 1.03) | 0.003           | 399.0 | 0.76    | Model 1<br>(reference)                    |
| Number of positive nodes                                             | 1.09 (1.03, 1.15) | 0.001           |       |         |                                           |
| PgR (positive)                                                       | 0.39 (0.19, 0.84) | 0.016           |       |         |                                           |
| Model 2 = T size + N+ (nr) + PgR + sTIL                              |                   |                 |       |         |                                           |
| T size (cm)                                                          | 1.02 (1.01, 1.03) | 0.002           | 393.1 | 0.75    | Model 2 vs<br>model 1,<br><i>p</i> =0.005 |
| Number of positive nodes                                             | 1.09 (1.04-1.15)  | 0.001           |       |         |                                           |
| PgR (positive)                                                       | 0.33 (0.16, 0.69) | 0.004           |       |         |                                           |
| sTIL (>0%)                                                           | 3.38 (1.28, 8.99) | 0.014           |       |         |                                           |
| PgR: progesterone receptors. cT size: clinical tumor (cT) size (cm). |                   |                 |       |         |                                           |

**Supplementary Table S4.** Multivariable Cox regression models for OS in luminal breast cancer.

| Models                                 | HR (95% CI)        | <i>p</i> -value | AIC   | C-index | LRT <i>p</i> -value                |
|----------------------------------------|--------------------|-----------------|-------|---------|------------------------------------|
| <b>Model 1 = N+ (nr) + KI67</b>        |                    |                 |       |         |                                    |
| Number of positive nodes               | 1.13 (1.05-1.21)   | < 0.001         | 186.6 | 0.79    | Model 1 (reference)                |
| Ki67 (continuous)                      | 1.04 (1.02, 1.06)  | < 0.001         |       |         |                                    |
| <b>Model 2 = N+ (nr) + KI67 + sTIL</b> |                    |                 |       |         |                                    |
| Number of positive nodes               | 1.12 (1.04-1.20)   | 0.002           | 186.8 | 0.80    | Model 2 vs model 1, <i>p</i> =0.19 |
| Ki67 (continuous)                      | 1.03 (1.01, 1.06)  | 0.001           |       |         |                                    |
| sTIL (>0%)                             | 2.45 (0.55, 10.93) | 0.238           |       |         |                                    |

**Supplementary Table S5.** Multivariable Cox regression models for OS in luminal B breast cancer.

| Models                                         | HR (95% CI)        | <i>p</i> -value | AIC   | C-index | LRT <i>p</i> -value               |
|------------------------------------------------|--------------------|-----------------|-------|---------|-----------------------------------|
| Model 1 = T size + N+ (nr) + KI67 + PgR        |                    |                 |       |         |                                   |
| T size (cm)                                    | 1.01 (0.99, 1.03)  | 0.199           | 185.1 | 0.77    | Model 1<br>(reference)            |
| Number of positive nodes                       | 1.12 (1.04-1.21)   | 0.002           |       |         |                                   |
| Ki67 (continuous)                              | 1.03 (1.01, 1.05)  | 0.007           |       |         |                                   |
| PgR (positive)                                 | 0.46 (0.16, 1.34)  | 0.15            |       |         |                                   |
| Model 2 = T size + N+ (nr) + KI67 + PgR + sTIL |                    |                 |       |         |                                   |
| T size (cm)                                    | 1.01 (0.99, 1.03)  | 0.179           | 185.3 | 0.79    | Model 2 vs<br>model 1,<br>p=0.185 |
| Number of positive nodes                       | 1.12 (1.04-1.20)   | 0.003           |       |         |                                   |
| Ki67 (continuous)                              | 1.03 (1.00, 1.05)  | 0.022           |       |         |                                   |
| PgR (positive)                                 | 0.43 (0.15, 1.28)  | 0.131           |       |         |                                   |
| sTIL (> 0%)                                    | 2.49 (0.55, 11.19) | 0.233           |       |         |                                   |

PgR: progesterone receptors. cT size: clinical tumor (cT) size (cm).
